# Supplementary material
Source: Springer Nature journal article supplement (https://www.springermedizin.de/resource/supplementary/10194_2013_303_MOESM1_ESM.pdf/9422650)

# ITG raw score

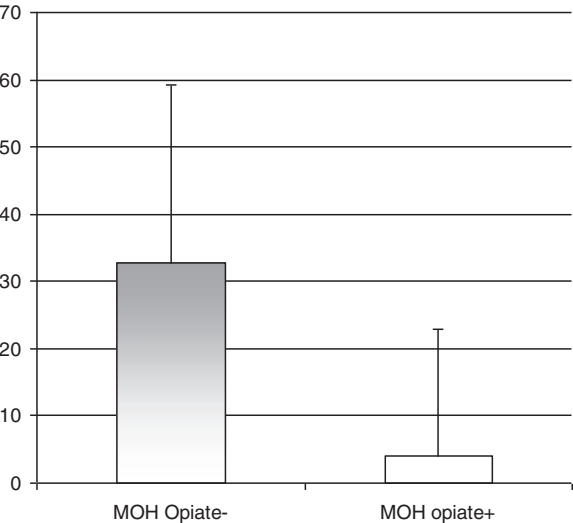

Supplement: MOESM1 [file 9422650]
